# Supplementary material for: The Cultivar Effect on the Taste and Aroma Substances of Hakka Stir-Fried Green Tea from Guangdong
Source: MDPI journal article supplement (doi:10.3390/foods12102067), 2023-05-20
Supplement: s1 [file s1]

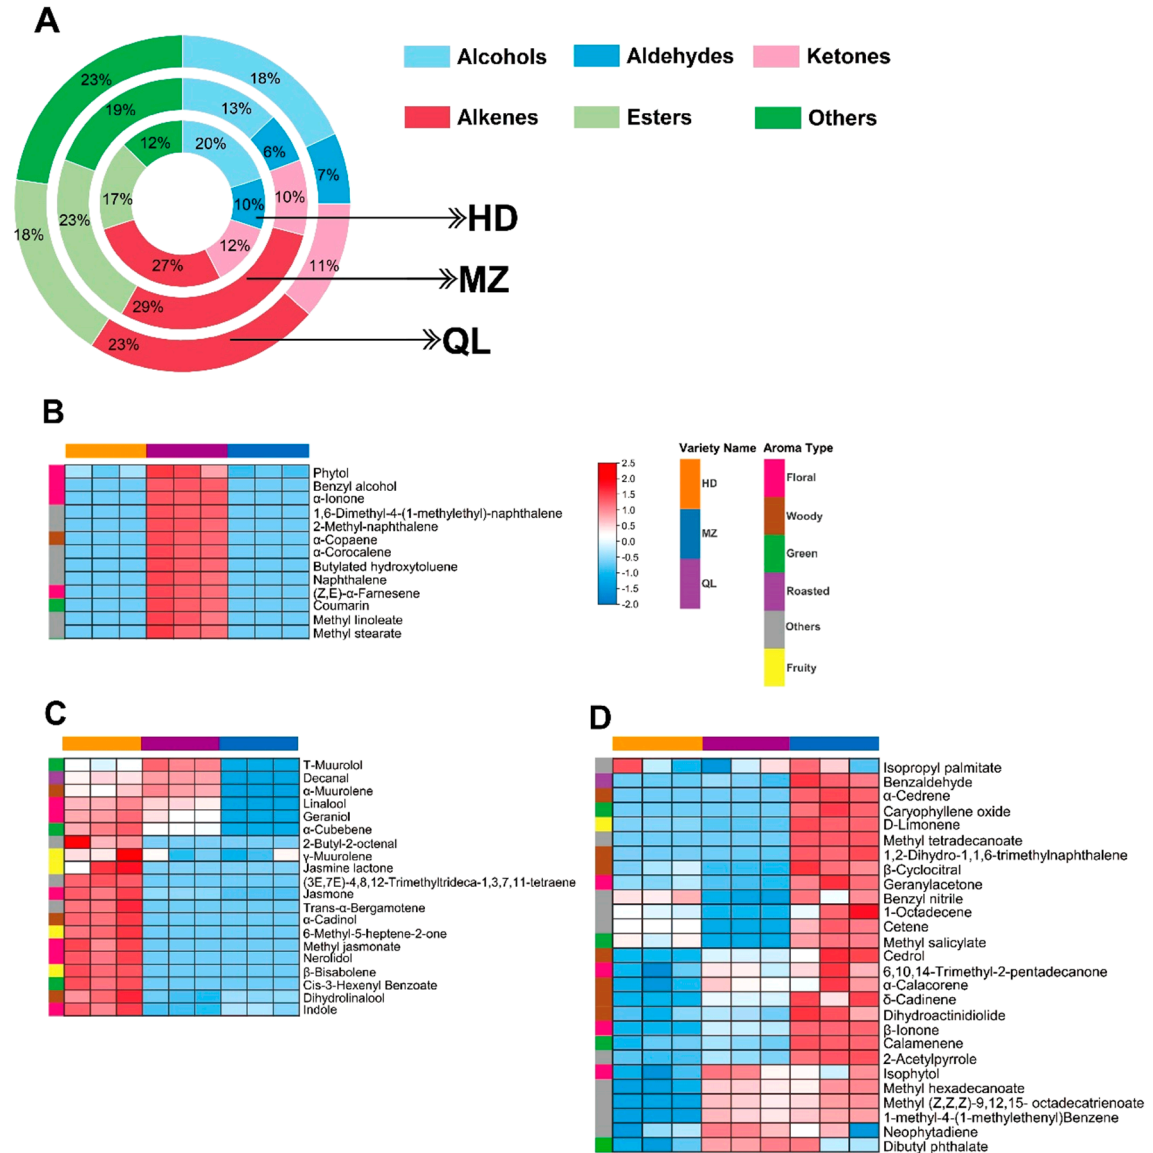

**Figure S1.** (A) Ratios of the 60 volatile compounds of HSGT and heatmaps of the major up-regulated volatile compounds in HSGTs made from (B) QL, (C) HD, and (D) MZ.
