# Supplementary material for: The Cultivar Effect on the Taste and Aroma Substances of Hakka Stir-Fried Green Tea from Guangdong
Source: Foods. 2023 May 20;12(10):2067. doi: 10.3390/foods12102067 (PMC10217579; doi:10.3390/foods12102067)
Supplement: Supplementary file 1 [file foods-12-02067-s001.zip › Table S1.xlsx]

## Sheet: Sheet1
Name	Retention Time	HD			MZ			QL			Channel	R	R^2	Correction type	Equation
Caffeine	8.398	2634666	2630403	2627942	2491795	2484636	2483325	2492158	2477338	2460942	W2489 ChA	0.999961	0.999922	LC	Y = 3.72e+004 X - 4.09e+004	X is the concentration (Mg/ml) and Y is the peak area.
theanine	7.153	396041	382236	341377	212131	205738	201830	1306023	1296153	1291978	W2489 ChA	0.999991	0.999982	LC	Y = 1.08e+004 X + 1.75e+003
C	14.779	303601	326326	339775	365101	366977	375533	357030	341621	341713	W2489 ChA	0.999877	0.999754	LC	Y = 7.47e+006 X + 3.04e+004
EC	16.249	1278143	1273154	1280369	1269676	1255369	1252012	1419514	1397539	1397131	W2489 ChA	0.999897	0.999794	LC	Y = 9.65e+006 X + 3.26e+004
ECG	19.701	7814941	7799334	7835266	6909551	6769927	6723468	5623955	5506538	5477812	W2489 ChA	0.999559	0.999119	LC	Y = 2.07e+007 X + 1.36e+005
EGC	13.437	1288468	1340678	1334534	1058602	1049016	1096851	1576785	1486078	1587164	W2489 ChA	0.999915	0.99983	LC	Y = 2.36e+006 X + 1.96e+003
EGCG	16.664	22913226	22898510	22854635	16654433	16485728	16532378	21190356	21166887	21196932	W2489 ChA	0.999891	0.999781	LC	Y = 1.65e+007 X - 1.43e+004
GC	10.361	65333	66430	67333	153978	153015	153644	62754	63922	62437	W2489 ChA	0.995418	0.990857	LC	Y = 2.40e+006 X - 5.65e+004
GCG	17.222	1522388	1575297	1613537	2266563	2248005	2253691	1271728	1233100	1217421	W2489 ChA	0.999966	0.999931	LC	Y = 1.71e+007 X + 1.29e+004
