# Supplementary material for: The Cultivar Effect on the Taste and Aroma Substances of Hakka Stir-Fried Green Tea from Guangdong
Source: Foods. 2023 May 20;12(10):2067. doi: 10.3390/foods12102067 (PMC10217579; doi:10.3390/foods12102067)
Supplement: Supplementary file 1 [file foods-12-02067-s001.zip › Table S2.xlsx]

## Sheet: Sheet1
One-way ANOVA with the Tukey’s post-hoc test
Caffine
Tukey's multiple comparisons test	Mean Diff.	95.00% CI of diff.	Below threshold?	Summary	Adjusted P Value
HD vs. MZ	1.165	0.9711 to 1.359	Yes	****	<0.0001
HD vs. QL	1.244	1.050 to 1.438	Yes	****	<0.0001
MZ vs. QL	0.079	-0.1149 to 0.2729	No	ns	0.47
C
Tukey's multiple comparisons test	Mean Diff.	95.00% CI of diff.	Below threshold?	Summary	Adjusted P Value
HD vs. MZ	-0.2433	-0.4048 to -0.08182	Yes	**	0.0086
HD vs. QL	-0.1247	-0.2862 to 0.03685	No	ns	0.1208
MZ vs. QL	0.1187	-0.04285 to 0.2802	No	ns	0.1397
EC
Tukey's multiple comparisons test	Mean Diff.	95.00% CI of diff.	Below threshold?	Summary	Adjusted P Value
HD vs. MZ	0.07467	-0.02231 to 0.1716	No	ns	0.1217
HD vs. QL	-0.5257	-0.6226 to -0.4287	Yes	****	<0.0001
MZ vs. QL	-0.6003	-0.6973 to -0.5034	Yes	****	<0.0001
ECG
Tukey's multiple comparisons test	Mean Diff.	95.00% CI of diff.	Below threshold?	Summary	Adjusted P Value
HD vs. MZ	1.952	1.603 to 2.300	Yes	****	<0.0001
HD vs. QL	4.383	4.034 to 4.731	Yes	****	<0.0001
MZ vs. QL	2.431	2.083 to 2.779	Yes	****	<0.0001
EGC
Tukey's multiple comparisons test	Mean Diff.	95.00% CI of diff.	Below threshold?	Summary	Adjusted P Value
HD vs. MZ	4.28	2.630 to 5.930	Yes	***	0.0005
HD vs. QL	-3.87	-5.520 to -2.220	Yes	***	0.0009
MZ vs. QL	-8.15	-9.800 to -6.500	Yes	****	<0.0001
EGCG
Tukey's multiple comparisons test	Mean Diff.	95.00% CI of diff.	Below threshold?	Summary	Adjusted P Value
HD vs. MZ	15.38	15.05 to 15.71	Yes	****	<0.0001
HD vs. QL	4.139	3.810 to 4.468	Yes	****	<0.0001
MZ vs. QL	-11.24	-11.57 to -10.91	Yes	****	<0.0001
GC
Tukey's multiple comparisons test	Mean Diff.	95.00% CI of diff.	Below threshold?	Summary	Adjusted P Value
HD vs. MZ	-1.9	-1.943 to -1.857	Yes	****	<0.0001
HD vs. QL	0.07267	0.02969 to 0.1156	Yes	**	0.0049
MZ vs. QL	1.973	1.930 to 2.016	Yes	****	<0.0001
GCG
Tukey's multiple comparisons test	Mean Diff.	95.00% CI of diff.	Below threshold?	Summary	Adjusted P Value
HD vs. MZ	-1.596	-1.779 to -1.412	Yes	****	<0.0001
HD vs. QL	0.767	0.5834 to 0.9506	Yes	****	<0.0001
MZ vs. QL	2.363	2.179 to 2.546	Yes	****	<0.0001
Theanine
Tukey's multiple comparisons test	Mean Diff.	95.00% CI of diff.	Below threshold?	Summary	Adjusted P Value
HD vs. MZ	1.537	1.140 to 1.934	Yes	****	<0.0001
HD vs. QL	-8.525	-8.922 to -8.128	Yes	****	<0.0001
MZ vs. QL	-10.06	-10.46 to -9.665	Yes	****	<0.0001
