# Supplementary material for: The Cultivar Effect on the Taste and Aroma Substances of Hakka Stir-Fried Green Tea from Guangdong
Source: Foods. 2023 May 20;12(10):2067. doi: 10.3390/foods12102067 (PMC10217579; doi:10.3390/foods12102067)
Supplement: Supplementary file 1 [file foods-12-02067-s001.zip › Table S3.xlsx]

## Sheet: Sheet1
No.	Compounds	Aroma description	Concentration (µg/kg dry weight of tea leaves)			RIc/RId
			HD	MZ	QL
	Alcohols
1	Linalool	Floral, sweet1	50.01±3.20	-	41.80±1.90	1103 /1104
2	Dihydrolinalool	Woody, citrus7	443.92±33.06	248.88±4.29	210.78±11.80	1110 /1108
3	Geraniol	Rose-like, sweet1	57.35±4.46	-	39.05±3.64	1258 /1267
4	Nerolidol	Floral, citrus1	346.78±25.54	-	-	1571 /1535
5	T-Muurolol	Herbal,weak spicy 6	14.69±1.04	-	27.27±1.29	1649 /1640
6	α-Cadinol	Woody, herbal1	16.5±1.29	-	-	1662 /1650
7	Isophytol	Floral, green1	3.35±0.42	5.47±0.65	6.12±0.52	1950 /1949
8	Phytol	Floral, balsam1	25.08±4.09	16.6±2.08	70.13±8.08	2114 /2122
9	Benzyl alcohol	Fruity, rose-like1	-	-	23.95±0.20	1039/1034
10	Cedrol	Woody5	-	30.18±9.34	12.79±0.42	1610/1608
	Aldehydes
1	Benzaldehyde	Caramel, fruity1	18.20±0.81	118.44±9.71	20.09±8.96	970 /961
2	Decanal	Floral, fried5	13.00±0.59	-	16.37±0.21	1207 /1200
3	β-Cyclocitral	Woody1	59.81±6.26	111.73±7.81	42.81±0.66	1224 /1214
4	2-Butyl-2-octenal	n.f.	17.47±5.41	-	-	1376 /1378
	Ketones
1	6-Methyl-5-heptene-2-one	Fruity, apple-like1	19.99±1.85	-	-	999 /988
2	Jasmone	Jasmine-like, floral1	86.20±6.56	-	12.47±0.56	1404 /1396
3	Geranylacetone	Floral4	110.46±11.36	264.17±21.21	72.66±3.02	1456 /1458
4	Jasmine lactone	Fruity6	99.20±40.69	-	-	1498 /1493
5	6,10,14-Trimethyl-2-pentadecanone	Jasmine-like, herbal1	48.9±4.10	69.55±4.70	62.01±2.78	1843 /1847
6	α-Ionone	Floral, violet1	-	-	32.87±0.35	1432/1426
7	β-Ionone	Floral, sweet1	-	609.74±2.78	222.42±10.38	1491/1490
	Alkenes
1	D-Limonene	Fruity, lemon-like1	28.9±0.50	77.28±2.10	23.99±0.20	1030 /1026
2	α-Cubebene	Herbal, waxy4	21.91±2.12	-	12.80±0.39	1354 /1354
3	trans-α-Bergamotene	n.f.	10.89±1.34	-	-	1440 /1438
4	γ-Muurolene	Citrus, herbal4	15.87±1.09	13.73±0.87	13.91±0.72	1482 /1474
5	α-Muurolene	Woody6	17.16±1.67	-	22.54±1.12	1506 /1517
6	β-Bisabolene	Citrus, woody4	73.12±3.11	-	-	1511 /1519
7	α-Calacorene	Woody6	11.88±0.82	18.93±2.07	17.17±0.69	1550 /1522
8	(3E,7E)-4,8,12-Trimethyltrideca-1,3,7,11-tetraene	n.f.	9.26±0.19	-	-	1582 /1581
9	Cetene	n.f.	13.46±0.39	22.16±2.46	-	1593 /1587
10	1-Octadecene	n.f.	1.38±0.14	2.83±1.05	-	1793 /1795
11	Neophytadiene	n.f.	17.01±9.67	27.48±17.66	48.96±3.42	2154 2155
12	α-Copaene	Woody, spicy 6	-	-	7.07±0.29	1380/1376
13	(Z, E)-α-Farnesene	Floral1	-	-	22.18±1.18	1511/1507
14	δ-Cadinene	Herbal, woody1	-	23.33±5.14	10.8±0.46	1520/1511
15	α-Corocalene	n.f.	-	-	5.58±0.27	1629/1629
16	α-Cedrene	Woody, spicy 6	-	31.49±1.42	-	1419 /1408
17	Caryophyllene oxide	Herbal, sweet7	-	15.53±1.15	-	1591 /1578
	Esters
1	Dihydroactinidiolide	Woody, fruity6	62.98±7.87	129.54±11.18	75.03±4.88	1539 /1525
2	Methyl salicylate	Peppermint, minty3	76.2±10.85	116.76±5.23	10.72±1.43	1198 /1187
3	cis-3-Hexenyl benzoate	Floral, green4	17.99±1.02	-	-	1576 /1573
4	Methyl jasmonate	Jasmine-like, floral1	37.69±4.15	-	-	1654 /1655
5	Methyl hexadecanoate	Oily, waxy3	8.54±2.99	52.32±6.51	46.96±1.88	1928 /1928
6	Dibutyl phthalate	Green2	3.55±0.45	5.55±1.00	6.69±0.16	1966 /1967
7	Isopropyl palmitate	Fat7	2.04±0.42	2.15±0.35	1.85±0.35	2026 /1999
8	Methyl linoleate	Oily, woody1	-	-	3.41±0.27	2096/2092
9	Methyl (Z, Z, Z)-9,12,15- octadecatrienoate	Oily, woody1	-	7.24±0.69	6.42±0.43	2102/2105
10	Methyl stearate	n.f.	-	-	1.33±0.10	2128/2130
11	Methyl tetradecanoate	Orris7	-	9.01±0.04	-	1794 /1726
	Others
1	1,2-Dihydro-1,1,6-	Woody1	16.68±0.46	91.69±3.53	14.22±0.76	1357 /1355
	trimethylnaphthalene
2	Calamenene	Herbal, spicy4	71.95±15.26	-	-	1529 /1543
3	1,6-Dimethyl-4-(1-methylethyl)-naphthalene	n.f.	-	-	12.42±0.25	1682/1652
4	2-Methyl-naphthalene	n.f.	-	-	8.24±0.34	1313/1315
5	Naphthalene	Pungent, tarry-like4	-	-	37.79±2.22	1186/1190
6	2-Acetylpyrrole	Nut, walnut7	21.12±1.15	71.65±2.39	30.03±2.72	1070/1063
7	Benzyl nitrile	n.f.	41.84±2.30	44.75±6.74	17.29±1.44	1142/1143
8	Indole	Floral3	404.5±31.14	123.94±16.25	49.71±3.87	1302/1293
9	Coumarin	Green, sweet7	-	99.01±26.08	11.03±0.64	1444/1432
10	Butylated hydroxytoluene	n.f.	-	14.08±0.73	12.66±0.76	1517/1533
11	1-Methyl-4-(1-methylethenyl) benzene	Spicy, phenolic4	-	-	36.2±3.69	1091/1095
‘n.f.’, A description of the aroma compound was not found in the literature. ‘-’,The compound was not detected. RIc: Retention index obtained using N-alkane calculations. RId: The published retention index of compounds in the NIST 14 library. 1-7: The aroma descriptions of the substances listed in the table were referenced from several literature sources. Specifically, the aroma descriptions labe…
