# Supplementary material for: The Cultivar Effect on the Taste and Aroma Substances of Hakka Stir-Fried Green Tea from Guangdong
Source: Foods. 2023 May 20;12(10):2067. doi: 10.3390/foods12102067 (PMC10217579; doi:10.3390/foods12102067)
Supplement: Supplementary file 1 [file foods-12-02067-s001.zip › Table S4.xlsx]

## Sheet: Sheet1
Var.No.	Volatile compounds
Var_1	Linalool
Var_2	Dihydrolinalool
Var_3	Geraniol
Var_4	Nerolidol
Var_5	T-Muurolol
Var_6	α-Cadinol
Var_7	Isophytol
Var_8	Phytol
Var_9	Benzyl alcohol
Var_10	Cedrol
Var_11	Benzaldehyde
Var_12	Decanal
Var_13	β-Cyclocitral
Var_14	2-Butyl-2-octenal
Var_15	6-Methyl-5-heptene-2-one
Var_16	Jasmone
Var_17	Geranylacetone
Var_18	Jasmine lactone
Var_19	6,10,14-Trimethyl-2-pentadecanone
Var_20	α-Ionone
Var_21	β-Ionone
Var_22	D-Limonene
Var_23	α-Cubebene
Var_24	Trans-α-Bergamotene
Var_25	γ-Muurolene
Var_26	α-Muurolene
Var_27	β-Bisabolene
Var_28	α-Calacorene
Var_29	(3E,7E)-4,8,12-Trimethyltrideca-1,3,7,11-tetraene
Var_30	Cetene
Var_31	1-Octadecene
Var_32	Neophytadiene
Var_33	α-Copaene
Var_34	(Z,E)-α-Farnesene
Var_35	δ-Cadinene
Var_36	α-Corocalene
Var_37	α-Cedrene
Var_38	Caryophyllene oxide
Var_39	Dihydroactinidiolide
Var_40	Methyl salicylate
Var_41	Cis-3-Hexenyl Benzoate
Var_42	Methyl jasmonate
Var_43	Methyl hexadecanoate
Var_44	Dibutyl phthalate
Var_45	Isopropyl palmitate
Var_46	Methyl linoleate
Var_47	Methyl (Z,Z,Z)-9,12,15- octadecatrienoate
Var_48	Methyl stearate
Var_49	Methyl tetradecanoate
Var_50	1,2-Dihydro-1,1,6-trimethylnaphthalene
Var_51	Calamenene
Var_52	1,6-Dimethyl-4-(1-methylethyl)-naphthalene
Var_53	2-Methyl-naphthalene
Var_54	Naphthalene
Var_55	2-Acetylpyrrole
Var_56	Benzyl nitrile
Var_57	Indole
Var_58	Coumarin
Var_59	Butylated hydroxytoluene
Var_60	1-methyl-4-(1-methylethenyl)Benzene
