# Supplementary material for: The Cultivar Effect on the Taste and Aroma Substances of Hakka Stir-Fried Green Tea from Guangdong
Source: Foods. 2023 May 20;12(10):2067. doi: 10.3390/foods12102067 (PMC10217579; doi:10.3390/foods12102067)
Supplement: Supplementary file 1 [file foods-12-02067-s001.zip › Table S5.xlsx]

## Sheet: Sheet1
	HD				MZ				QL
Bitterness	4	4	3	6	5	7	7	7	6.5	6	6	7
Astringent	7	7	6	6	9	6	9	8	3.5	4	5	6
Sweet after-taste	8	6	8	7	6	5	6	6	8.5	8	7	7
Floral	8.5	7	8	7	3	3	2	3	3	4	3	5
Green	5	4	5	6	4	3	3	4	5	5	6	7
Roasted	2	2	3	3	7.5	8	8	8	6	5	4	5
Overall acceptability	7	8	6	7	7	5	5	5	8	7	7	6
